# Supplementary material for: Regulating Crystal Facets of MnO2 for Enhancing Peroxymonosulfate Activation to Degrade Pollutants: Performance and Mechanism
Source: MDPI journal article supplement (doi:10.3390/catal12030342), 2022-03-17
Supplement: s1 [file s1]

Archive with 1 entries (1 files):
- catalysts-1645740-supplementary.pdf
