# Supplementary material for: Regulating Crystal Facets of MnO2 for Enhancing Peroxymonosulfate Activation to Degrade Pollutants: Performance and Mechanism
Source: MDPI journal article supplement (doi:10.3390/catal12030342), 2022-03-17
Supplement: s1 [file s1 › catalysts-1645740-supplementary.pdf]

# **Regulating crystal facets of MnO<sub>2</sub> for enhancing peroxymonosulfate activation to degrade pollutants: Performance and mechanism**

*Juncong Fu<sup>a,1</sup>, Peng Gao<sup>b,1</sup>, Lu Wang<sup>a</sup>, Yongqing Zhang<sup>a,c,d,\*</sup>, Yuhui Deng<sup>a</sup>, Renfeng Huang<sup>a</sup>, Shuaifei Zhao<sup>e</sup>, Zebin Yu<sup>f</sup>, Yuancheng Wei<sup>g</sup>, Guangzhao Wang<sup>h</sup>, Shaoqi Zhou<sup>i</sup>*

<sup>a</sup> *School of Environment and Energy, Guangdong Provincial Key Laboratory of Atmospheric Environment and Pollution Control, South China University of Technology, Guangzhou 510640, China.*

<sup>b</sup> *School of Chemistry and Molecular Bioscience, University of Wollongong, NSW 2500, Australia.*

<sup>c</sup> *The Key Lab of Pollution Control and Ecosystem Restoration in Industry Clusters, Ministry of Education, Guangzhou 510006, China.*

<sup>d</sup> *State Key Laboratory of Pulp and Paper, South China University of Technology, Guangzhou*

<sup>e</sup> *Institute for Frontier Materials, Deakin University, Geelong, Victoria, 3216, Australia*

<sup>f</sup> *School of Resources, Environment and Materials, Guangxi University, Nanning 530004 Guangxi, P.R. China*

<sup>g</sup> *Preliminary Work Management Center for Government Investment Project of Shenzhen Longhua District*

<sup>h</sup> *Key Laboratory of Extraordinary Bond Engineering and Advanced Materials Technology of Chongqing, School of Electronic Information Engineering, Yangtze Normal University*

<sup>i</sup> *Guizhou Academy of Sciences, Shanxi Road 1, Guiyang, 550001, China*

<sup>1</sup> *These authors contributed equally to this work.*

**\* Corresponding author: Yongqing Zhang**

**Tel: +86 13434389968**

**Fax: +86-20-39380508**

**E-mail address: [zhangyq@scut.edu.cn](mailto:zhangyq@scut.edu.cn)**

### **Text S1 DFT Calculation Method.**

The density functional theory (DFT) calculations were performed using the Vienna Ab initio Simulation Package (VASP) with plane wave basis sets and projector-augmented wave (PAW) pseudopotentials [1-3]. The generalized gradient approximation (GGA) of the Perdew–Burke–Ernzerhof functional (PBE) with Hubbard  $U$  corrections was used for all geometry optimizations and energy calculations [4, 5]. The planewave cut-off energy was set to 500 eV and  $U=1.6$  eV [6]. For calculations of bulks, the  $(3 \times 3 \times 3)$  Monkhorst–Pack meshes were used for the k-point samplings [7]. To study the slab model, the thickness of the vacuum layer along the z-direction was set to 15 Å to ensure negligible interactions between the slab surfaces due to periodic boundary conditions. Calculation convergence thresholds for the electronic structure and forces were set to be  $10^{-5}$  eV and  $0.02$  eV Å<sup>-1</sup>, respectively. The adsorption energy ( $E_{ads}$ ) of PMS molecules on facet-engineered  $\alpha$ -MnO<sub>2</sub> was calculated as follows [8]:

$$E_{ads} = E_{total} - E_{basic} - E_{molecule} \quad (1)$$

where  $E_{ads}$  means the adsorption energy of PMS molecule,  $E_{total}$  means the total energy of the surface with PMS,  $E_{basic}$  represent the total energy of the surface without PMS, and  $E_{molecule}$  is the energy of PMS.

## Text S2 Reagents used in the experiment.

*p*-Chloroaniline (PCA, > 99.5%), 5,5-Dimethyl-1-pyrroline N-oxide (DMPO, 97.0%), Potassium iodide (KI, > 99.0%), 4-Hydroxy-2,2,6,6-tetramethylpiperidine (TEMP, > 99.0%), tert-butanol (TBA, > 99.0%), furfuryl alcohol (FFA, > 98.0%), methanol (MeOH, HPLC), sodium thiosulfate pentahydrate ( $\text{Na}_2\text{S}_2\text{O}_3 \cdot 5\text{H}_2\text{O}$ , > 99.0%), sodium bicarbonate ( $\text{NaHCO}_3$ , >99.0%), ethanol (EtOH), Rhodamine B (RhB, AR), ammonium oxalate monohydrate ( $(\text{NH}_4)_2\text{C}_2\text{O}_4 \cdot \text{H}_2\text{O}$ , > 99.8%), ammonium sulfate ( $(\text{NH}_4)_2\text{SO}_4$ , > 99.0%), manganese sulfate monohydrate ( $\text{MnSO}_4 \cdot \text{H}_2\text{O}$ , > 99.0%), ammonium persulfate ( $(\text{NH}_4)_2\text{S}_2\text{O}_8$ , > 98.0%), humic acid (HA,  $\geq 90.0\%$ ), phenol (> 99.0%), *p*-Benzoquinone (*p*-BQ, > 99.0%), 4-Mercaptobenzoic acid (> 90.0%) were purchased from Shanghai Aladdin Chemistry Inc., China. Imidacloprid (IMI, AR) was purchased from Yuanye Biotechnology Company (Shanghai China). Sodium hydroxide (NaOH,  $\geq 98\%$ ), sodium nitrate ( $\text{NaNO}_3$ , > 99.0%), sodium perchlorate ( $\text{NaClO}_4$ , > 99.0%) were purchased from Tianjin Kemiou Chemical Reagent Co., Ltd., China. Potassium permanganate ( $\text{KMnO}_4$ ,  $\geq 99.5\%$ ), potassium nitrate ( $\text{KNO}_3$ , > 99.0%), sulfuric acid ( $\text{H}_2\text{SO}_4$ ,  $\geq 98\%$ ) were purchased from Guangzhou chemical reagent factory. Tetracycline hydrochloride (TC, > 96.0%), potassium monopersulfate triple salt (PMS, > 42%), sodium sulfate anhydrous ( $\text{Na}_2\text{SO}_4$ , > 99.0%), sodium nitrite ( $\text{NaNO}_2$ , > 99.0%) were purchased from Macklin Biochemical Technology Co., Ltd, China. Sodium chloride ( $\text{NaCl}$ , > 99.5%) was purchased from Tianjin Damao Chemical Reagent Factory, China. Deionized water was made by Milli-Q System and used for all experiments.

### **Text S3 Experimental sample preparation.**

**TOC sample preparation.** During the degradation experiment, 5 mL of the reaction filter liquor was taken at given time intervals and added to a 50 mL centrifuge tube containing 10 mL of NaNO<sub>2</sub> (50 mM) for the TOC test.

**EPR sample preparation.** For the radicals capture test, 0.5 mL of 2 mol/L DMPO was added to 9.5 mL of the reaction mixture, and samples were taken for EPR analysis after 3 min. For the singlet oxygen capture test, 0.5 mL of 200 mmol/L TEMP was added to 9.5 mL of the reaction mixture, and samples were taken for EPR analysis after 3 min.

**Cyclic voltammetry (CV) curves.** 10 mg of catalyst was mixed with 1 mL of ethanol, then 0.5 mL of Nafion solution was added. To completely disperse the catalyst into liquid, the mixture was sonicated for 15 min. Then, 5 µL of the mixed solution was dropped on the surface of the polished glassy carbon electrode and allowed to dry naturally. Silver/silver chloride electrode (Ag/AgCl) and Pt wire electrode were used as reference electrode and counter electrode, respectively. CV curves were measured at the potential from 0.0 - 1.5 V (vs. Ag/AgCl) with a scanning rate of 50 mV/s with 100 mmol/L Na<sub>2</sub>SO<sub>4</sub> as supporting electrolyte.

**Sulphydryl modification steps.** 25 mg of catalyst was dispersed in 100 mL of 10 mmol/L 4-Mercaptobenzoic acid under magnetic stirring for 24 h [9]. FTIR spectra were used to verify whether the modification was successful.

Table. S1. Properties of the three MnO<sub>2</sub> catalysts

| Sample               | S <sub>BET</sub> /(m <sup>2</sup> /g) | Total pore volume/(cm <sup>3</sup> /g) | Average pore diameter/(nm) |
|----------------------|---------------------------------------|----------------------------------------|----------------------------|
| 100-MnO <sub>2</sub> | 67.8                                  | 0.56                                   | 32.8                       |
| 110-MnO <sub>2</sub> | 104.9                                 | 0.69                                   | 26.3                       |
| 310-MnO <sub>2</sub> | 116.0                                 | 0.53                                   | 18.2                       |

Table. S2. Chemical and surface compositions of facet engineered MnO<sub>2</sub> before and after the reaction

| samples                                  | Mn <sup>2+</sup><br>(%) | Mn <sup>3+</sup><br>(%) | Mn <sup>4+</sup><br>(%) | O <sub>latt</sub><br>(%) | O <sub>ads</sub><br>(%) | Mn <sup>2+</sup> +Mn <sup>3+</sup> /Mn <sup>4+</sup> | O <sub>ads</sub> /O <sub>latt</sub> | AOS <sup>a</sup> |
|------------------------------------------|-------------------------|-------------------------|-------------------------|--------------------------|-------------------------|------------------------------------------------------|-------------------------------------|------------------|
| 100-MnO <sub>2</sub>                     | 7.05                    | 36.57                   | 56.38                   | 65.19                    | 34.81                   | 0.77                                                 | 0.53                                | 3.53             |
| 110-MnO <sub>2</sub>                     | 7.43                    | 37.95                   | 54.62                   | 70.20                    | 29.80                   | 0.83                                                 | 0.42                                | 3.55             |
| 310-MnO <sub>2</sub>                     | 6.55                    | 37.66                   | 55.79                   | 69.19                    | 30.81                   | 0.79                                                 | 0.45                                | 3.55             |
| 310-MnO <sub>2</sub><br>(After reaction) | 7.68                    | 35.03                   | 57.29                   | 68.67                    | 31.33                   | 0.75                                                 | 0.46                                | 3.57             |

<sup>a</sup>The average oxidation state (AOS) of Mn was calculated by the equation  $AOS = 8.956 - 1.126\Delta E$  ( $\Delta E$  is the binding energy difference of Mn 3s) [10].

Table. S3. Analytical details for organic compounds by HPLC

| Organics | Mobile phase<br>(A/B)         | Ratio of A/B<br>(v/v) | Detective wavelength<br>(nm) | Flow rate<br>(mL/min) |
|----------|-------------------------------|-----------------------|------------------------------|-----------------------|
| PCA      | methanol/H <sub>2</sub> O     | 70/30                 | 254                          | 0.7                   |
| phenol   | methanol/H <sub>2</sub> O     | 70/30                 | 270                          | 0.8                   |
| IMI      | acetonitrile/H <sub>2</sub> O | 70/30                 | 270                          | 0.7                   |

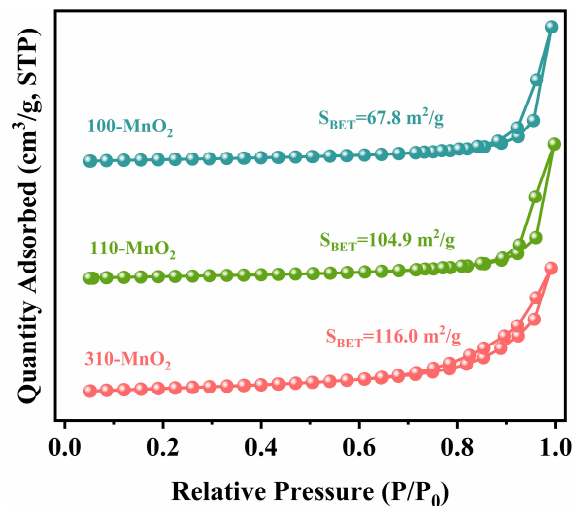

Fig. S1 The  $N_2$  adsorption/desorption isotherms of the three  $MnO_2$  catalysts.

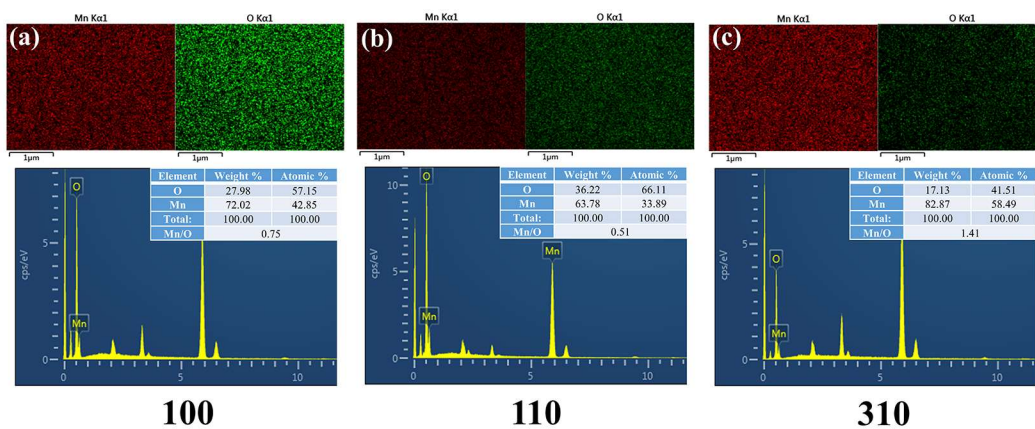

Fig. S2 EDS-mapping images of (a) 100- $MnO_2$ , (b) 110- $MnO_2$ , and (c) 310- $MnO_2$ .

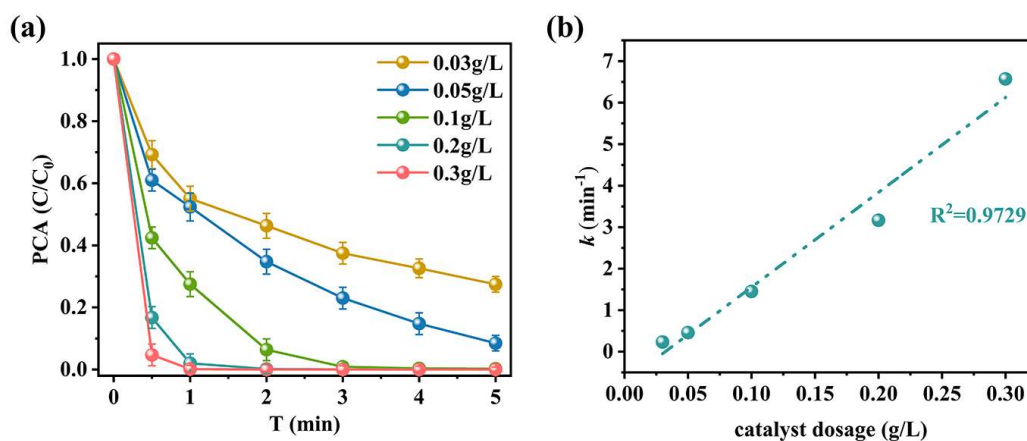

Fig. S3 (a) Effect of  $MnO_2$  dosage in 310- $MnO_2$ /PMS system and (b) correlation of the rate constants to the  $MnO_2$  dosage, reaction conditions:  $[PCA]_0 = 1.0$  mmol/L,  $[PMS]_0 = 1.5$  mmol/L,  $[MnO_2]_0 = 0.03-0.3$  g/L, without pH adjustment.

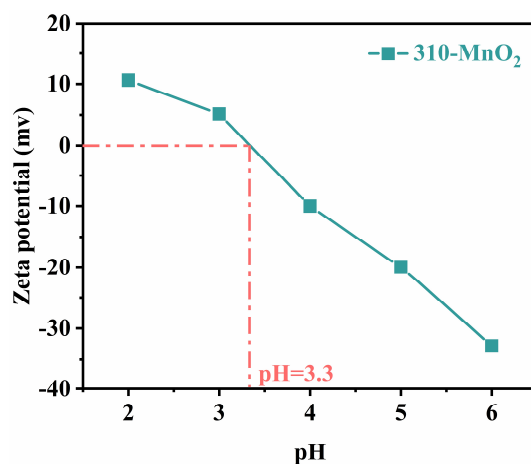

Fig. S4 The zeta potential curves of the 310-MnO<sub>2</sub>, test conditions: [MnO<sub>2</sub>]<sub>0</sub> = 0.1 g/L.

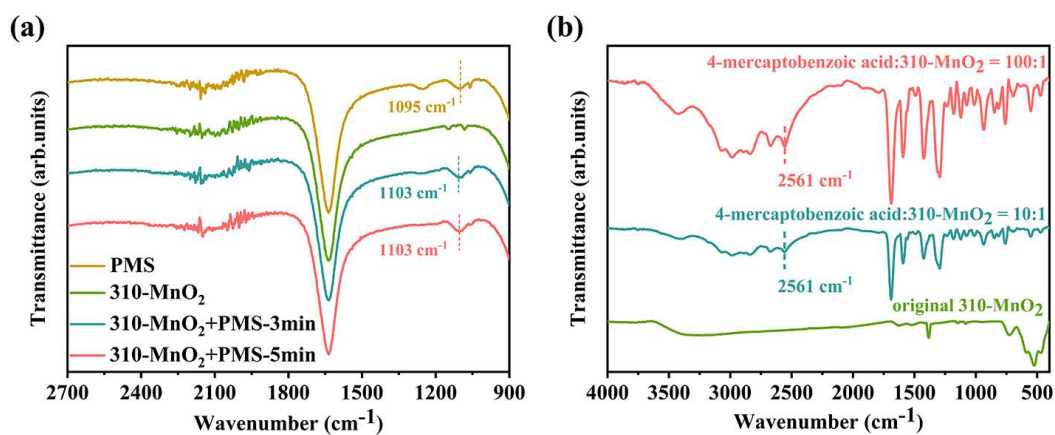

Fig. S5 (a) ATR-FTIR spectra demonstrating the PMS complexation on the catalyst surface, reaction conditions: [PMS]<sub>0</sub> = 60 mmol/L, [MnO<sub>2</sub>]<sub>0</sub> = 4 g/L, without pH adjustment; (b) ATR-FTIR spectra of 310-MnO<sub>2</sub> solid before and after modifying with -SH group.

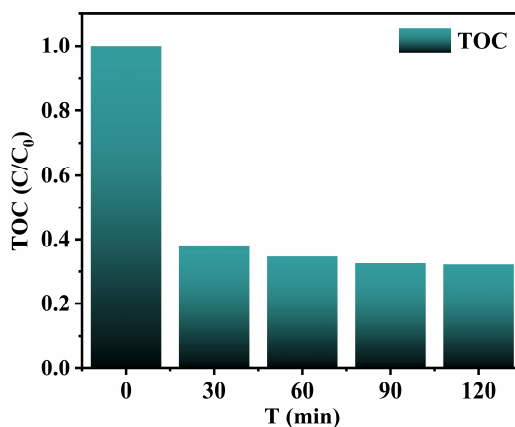

Fig. S6 TOC removal of PCA degradation with 310-MnO<sub>2</sub>/PMS system, reaction conditions: [PCA]<sub>0</sub> = 1.0 mM, [PMS]<sub>0</sub> = 1.5 mM, [MnO<sub>2</sub>]<sub>0</sub> = 0.1 g/L, without pH adjustment.

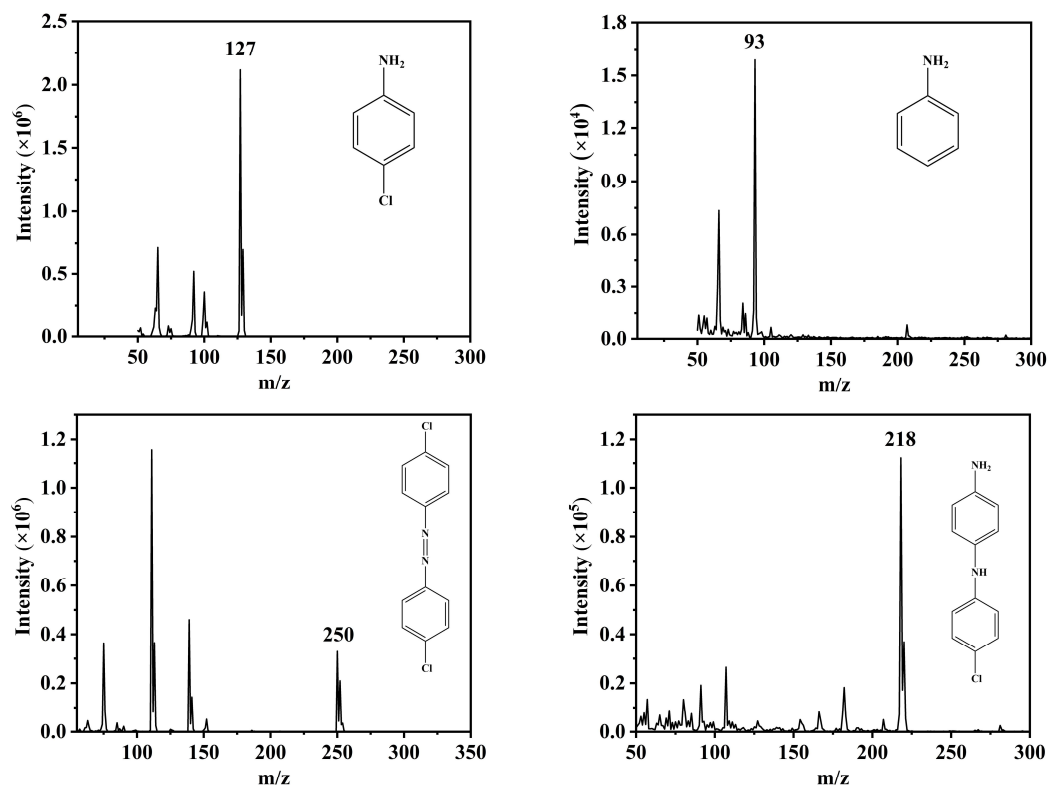

Fig. S7 Mass spectra and proposed structure of possible intermediate products.

## References:

1. W. Kohn, L.J. Sham, Self-Consistent Equations Including Exchange and Correlation Effects, *Phys. Rev.* 140(4A) (1965) A1133-A1138. <https://doi.org/10.1103/PhysRev.140.A1133>.
2. G. Kresse, J. Furthmuller, Efficiency of ab-initio total energy calculations for metals and semiconductors using a plane-wave basis set, *Comput. Mater. Sci.* 6(1) (1996) 15-50. [https://doi.org/10.1016/0927-0256\(96\)00008-0](https://doi.org/10.1016/0927-0256(96)00008-0).
3. G. Kresse, D. Joubert, From ultrasoft pseudopotentials to the projector augmented-wave method, *Phys. Rev. B* 59(3) (1999) 1758-1775. <https://doi.org/10.1103/PhysRevB.59.1758>.
4. J.P. Perdew, K. Burke, M. Ernzerhof, Generalized Gradient Approximation Made Simple, *Phys. Rev. Lett.* 77(18) (1996) 3865-3868. <https://doi.org/10.1103/PhysRevLett.77.3865>.
5. G.A.E. Oxford, A.M. Chaka, First-Principles Calculations of Clean, Oxidized, and Reduced beta-MnO<sub>2</sub> Surfaces, *J. Phys. Chem. C* 115(34) (2011) 16992-17008. <https://doi.org/10.1021/jp2037137>.
6. Y. Crespo, N. Seriani, A lithium peroxide precursor on the alpha-MnO<sub>2</sub> (100) surface, *J. Mater. Chem. A* 2(39) (2014) 16538-16546. <https://doi.org/10.1039/c4ta02658f>.
7. H.J. Monkhorst, J.D. Pack, Special points for Brillouin-zone integrations, *Phys. Rev. B* 13(12) (1976) 5188-5192. <https://doi.org/10.1103/PhysRevB.13.5188>.
8. J. Yu, T. Zeng, H. Wang, H. Zhang, Y.P. Sun, L. Chen, S. Song, L.X.Y. Li, H.X. Shi, Oxygen - defective MnO<sub>2-x</sub> rattle-type microspheres mediated singlet oxygen oxidation of organics by peroxymonosulfate activation, *Chem. Eng. J.* 394 (2020) 124458. <https://doi.org/10.1016/j.cej.2020.124458>.
9. X. Du, Y. Zhang, F. Si, C. Yao, M. Du, I. Hussain, H. Kim, S. Huang, Z. Lin, W. Hayat, Persulfate non-radical activation by nano-CuO for efficient removal of chlorinated organic compounds: Reduced graphene oxide-assisted and CuO (001) facet-dependent, *Chem. Eng. J.* 356 (2019) 178-189. <https://doi.org/10.1016/j.cej.2018.08.216>.
10. Y. Yang, J. Huang, S. Wang, S. Deng, B. Wang, G. Yu, Catalytic removal of gaseous unintentional POPs on manganese oxide octahedral molecular sieves, *Appl. Catal. B* 142 (2013) 568-578. <https://doi.org/10.1016/j.apcatb.2013.05.048>.
